# Supplementary material for: Mutation spectrum in a cohort with familial exudative vitreoretinopathy
Source: PubMed Central journal article supplement (PMC9482396; doi:10.1002/mgg3.2021), 2022-07-25
Supplement: MGG3-10-e2021-s001.pdf [file MGG3-10-e2021-s001.pdf]

Supplementary Table 1. 792 genes used for common inherited eye diseases on the Target\_Eye\_792\_V2 chip.

| No | Gene           | OMIM   | No  | Gene            | OMIM   | No  | Gene            | OMIM   | No  | Gene            | OMIM   |
|----|----------------|--------|-----|-----------------|--------|-----|-----------------|--------|-----|-----------------|--------|
| 1  | <i>COLEC11</i> | 612502 | 201 | <i>FRAS1</i>    | 607830 | 401 | <i>RGS9BP</i>   | 607814 | 601 | <i>ARSE</i>     | 300180 |
| 2  | <i>ATF6</i>    | 605537 | 202 | <i>GRIP1</i>    | 601993 | 402 | <i>SLC4A4</i>   | 603345 | 602 | <i>EBP</i>      | 300205 |
| 3  | <i>CNGA3</i>   | 600053 | 203 | <i>FREM2</i>    | 608945 | 403 | <i>TIMP3</i>    | 188826 | 603 | <i>GNPAT</i>    | 602744 |
| 4  | <i>CNGB3</i>   | 605080 | 204 | <i>FRMD7</i>    | 300628 | 404 | <i>ABCC6</i>    | 177850 | 604 | <i>CNTN1</i>    | 600016 |
| 5  | <i>GNAT2</i>   | 139340 | 205 | <i>COL8A2</i>   | 120252 | 405 | <i>RDH5</i>     | 601617 | 605 | <i>RAD21</i>    | 606462 |
| 6  | <i>PDE6H</i>   | 601190 | 206 | <i>TCF4</i>     | 602272 | 406 | <i>PAX2</i>     | 167409 | 606 | <i>SMC1A</i>    | 300040 |
| 7  | <i>MPZ</i>     | 159440 | 207 | <i>ZEB1</i>     | 189909 | 407 | <i>WDR19</i>    | 608151 | 607 | <i>ALDH18A1</i> | 138250 |
| 8  | <i>HMCN1</i>   | 608548 | 208 | <i>GALK1</i>    | 604313 | 408 | <i>KCNV2</i>    | 607604 | 608 | <i>ATP6VOA2</i> | 611716 |
| 9  | <i>TLR4</i>    | 603030 | 209 | <i>GALE</i>     | 606953 | 409 | <i>CACNA2D4</i> | 608171 | 609 | <i>EFEMP2</i>   | 604633 |
| 10 | <i>CST3</i>    | 604312 | 210 | <i>GALT</i>     | 606999 | 410 | <i>CLCN7</i>    | 602727 | 610 | <i>LTBP4</i>    | 604710 |
| 11 | <i>CX3CR1</i>  | 601470 | 211 | <i>ANTXR1</i>   | 606410 | 411 | <i>HFE</i>      | 613609 | 611 | <i>PYCR1</i>    | 179035 |
| 12 | <i>CFI</i>     | 217030 | 212 | <i>GBA</i>      | 606463 | 412 | <i>ASRGL1</i>   | 609212 | 612 | <i>PRX</i>      | 605725 |
| 13 | <i>C2</i>      | 613927 | 213 | <i>ROBO3</i>    | 608630 | 413 | <i>CEP164</i>   | 614848 | 613 | <i>DBH</i>      | 609312 |
| 14 | <i>CFB</i>     | 138470 | 214 | <i>ASB10</i>    | 615054 | 414 | <i>GFAP</i>     | 137780 | 614 | <i>ADAR</i>     | 146920 |
| 15 | <i>C9</i>      | 120940 | 215 | <i>GLB1</i>     | 611458 | 415 | <i>ZFYVE26</i>  | 612012 | 615 | <i>EMD</i>      | 300384 |
| 16 | <i>FBLN5</i>   | 604580 | 216 | <i>GM2A</i>     | 613109 | 416 | <i>MIR204</i>   | 610942 | 616 | <i>LMNA</i>     | 150330 |
| 17 | <i>CFH</i>     | 134370 | 217 | <i>HEXA</i>     | 606869 | 417 | <i>RDH11</i>    | 607849 | 617 | <i>SYNE2</i>    | 608442 |
| 18 | <i>ERCC6</i>   | 609413 | 218 | <i>MLPH</i>     | 606526 | 418 | <i>TUB</i>      | 601197 | 618 | <i>LAMA3</i>    | 600805 |
| 19 | <i>HTRA1</i>   | 602194 | 219 | <i>RAB27A</i>   | 603868 | 419 | <i>ITM2B</i>    | 603904 | 619 | <i>MYH11</i>    | 160745 |
| 20 | <i>ARMS2</i>   | 611313 | 220 | <i>OAT</i>      | 613349 | 420 | <i>RBP4</i>     | 180250 | 620 | <i>MYLK</i>     | 600922 |
| 21 | <i>C3</i>      | 120700 | 221 | <i>JAM3</i>     | 606871 | 421 | <i>LAMA1</i>    | 150320 | 621 | <i>PRKG1</i>    | 176894 |
| 22 | <i>JAG1</i>    | 601920 | 222 | <i>ACVRL1</i>   | 601284 | 422 | <i>TREX1</i>    | 606609 | 622 | <i>ASAHI</i>    | 613468 |
| 23 | <i>NOTCH2</i>  | 600275 | 223 | <i>ATL1</i>     | 606439 | 423 | <i>PANK2</i>    | 606157 | 623 | <i>PORCN</i>    | 300651 |
| 24 | <i>COL4A4</i>  | 120131 | 224 | <i>HPS1</i>     | 604982 | 424 | <i>PRKCG</i>    | 176980 | 624 | <i>FMR1</i>     | 309550 |
| 25 | <i>COL4A5</i>  | 303630 | 225 | <i>AP3B1</i>    | 603401 | 425 | <i>TRNT1</i>    | 612907 | 625 | <i>CTSA</i>     | 613111 |
| 26 | <i>ALMS1</i>   | 606844 | 226 | <i>HPS3</i>     | 606118 | 426 | <i>ABHD12</i>   | 613599 | 626 | <i>APC</i>      | 611731 |
| 27 | <i>TP63</i>    | 603273 | 227 | <i>HPS4</i>     | 606682 | 427 | <i>MT-TP</i>    | 590075 | 627 | <i>KIF1BP</i>   | 609367 |
| 28 | <i>FGF10</i>   | 602115 | 228 | <i>HPS5</i>     | 607521 | 428 | <i>ANAPC1</i>   | 608473 | 628 | <i>AGXT</i>     | 604285 |
| 29 | <i>SLC2A10</i> | 606145 | 229 | <i>HPS6</i>     | 607522 | 429 | <i>EMC1</i>     | 616846 | 629 | <i>GRHPR</i>    | 604296 |
| 30 | <i>APTX</i>    | 606350 | 230 | <i>DTNBP1</i>   | 607145 | 430 | <i>NEUROD1</i>  | 601724 | 630 | <i>HOGA1</i>    | 613597 |
| 31 | <i>SETX</i>    | 608465 | 231 | <i>BLOC1S3</i>  | 609762 | 431 | <i>OR2W3</i>    | 616729 | 631 | <i>PTH</i>      | 168450 |
| 32 | <i>FOXC1</i>   | 601090 | 232 | <i>BLOC1S6</i>  | 604310 | 432 | <i>SPP2</i>     | 602637 | 632 | <i>STS</i>      | 300747 |
| 33 | <i>PITX2</i>   | 601542 | 233 | <i>CBS</i>      | 613381 | 433 | <i>ADGRA3</i>   | 612303 | 633 | <i>KDM6A</i>    | 300128 |
| 34 | <i>ACTB</i>    | 102630 | 234 | <i>IDUA</i>     | 252800 | 434 | <i>AGBL5</i>    | 615900 | 634 | <i>KMT2D</i>    | 602113 |
| 35 | <i>ACTG1</i>   | 102560 | 235 | <i>FTL</i>      | 134790 | 435 | <i>ARL3</i>     | 604695 | 635 | <i>ATP13A2</i>  | 610513 |
| 36 | <i>GABRB1</i>  | 137190 | 236 | <i>GCM2</i>     | 603716 | 436 | <i>DHX38</i>    | 605584 | 636 | <i>SGCB</i>     | 600900 |
| 37 | <i>IFT27</i>   | 615870 | 237 | <i>FAM126A</i>  | 610531 | 437 | <i>EXOSC2</i>   | 602238 | 637 | <i>SGCD</i>     | 601411 |
| 38 | <i>BBS1</i>    | 209901 | 238 | <i>GJB2</i>     | 121011 | 438 | <i>HK1</i>      | 142600 | 638 | <i>TTN</i>      | 188840 |
| 39 | <i>BBS10</i>   | 610148 | 239 | <i>IKBK</i>     | 300248 | 439 | <i>KIAA1549</i> | 613344 | 639 | <i>COX7B</i>    | 300885 |
| 40 | <i>TRIM32</i>  | 602290 | 240 | <i>ACO2</i>     | 100850 | 440 | <i>KIZ</i>      | 615757 | 640 | <i>CREBBP</i>   | 600140 |
| 41 | <i>BBS12</i>   | 610683 | 241 | <i>ADAMTSL4</i> | 610113 | 441 | <i>MVK</i>      | 251170 | 641 | <i>TGFBR1</i>   | 190181 |
| 42 | <i>MKS1</i>    | 609883 | 242 | <i>RAX</i>      | 601881 | 442 | <i>PRPF4</i>    | 607795 | 642 | <i>TGFBR2</i>   | 190182 |
| 43 | <i>WDPCP</i>   | 613580 | 243 | <i>GDF6</i>     | 601147 | 443 | <i>FLVCR1</i>   | 609144 | 643 | <i>SMAD3</i>    | 603109 |
| 44 | <i>SDCCAG8</i> | 613524 | 244 | <i>MFRP</i>     | 606227 | 444 | <i>RP1</i>      | 603937 | 644 | <i>TGFB2</i>    | 190220 |
| 45 | <i>LZTFL1</i>  | 606568 | 245 | <i>PRSS56</i>   | 613858 | 445 | <i>IMPDH1</i>   | 146690 | 645 | <i>TGFB3</i>    | 190230 |
| 46 | <i>BBIP1</i>   | 613605 | 246 | <i>GDF3</i>     | 606522 | 446 | <i>PRPF31</i>   | 606419 | 646 | <i>KCNH2</i>    | 152427 |
| 47 | <i>BBS2</i>    | 606151 | 247 | <i>CNNM4</i>    | 607805 | 447 | <i>CRB1</i>     | 604210 | 647 | <i>KCNJ2</i>    | 600681 |
| 48 | <i>BBS4</i>    | 600374 | 248 | <i>CSPP1</i>    | 611654 | 448 | <i>PRPF8</i>    | 607300 | 648 | <i>TSC1</i>     | 605284 |
| 49 | <i>BBS5</i>    | 603650 | 249 | <i>TCTN2</i>    | 613846 | 449 | <i>TULP1</i>    | 602280 | 649 | <i>TSC2</i>     | 191092 |
| 50 | <i>MKKS</i>    | 604896 | 250 | <i>B9D1</i>     | 614144 | 450 | <i>CA4</i>      | 114760 | 650 | <i>MAN2B1</i>   | 609458 |
| 51 | <i>BBS7</i>    | 607590 | 251 | <i>INPP5E</i>   | 613037 | 451 | <i>PRPF3</i>    | 607301 | 651 | <i>MANBA</i>    | 609489 |
| 52 | <i>BBS9</i>    | 607968 | 252 | <i>TTC21B</i>   | 612014 | 452 | <i>ABCA4</i>    | 601691 | 652 | <i>GNAS</i>     | 139320 |
| 53 | <i>PTCH1</i>   | 601309 | 253 | <i>KIF7</i>     | 611254 | 453 | <i>RP2</i>      | 300757 | 653 | <i>FLNA</i>     | 300017 |
| 54 | <i>PTCH2</i>   | 603673 | 254 | <i>TCTN1</i>    | 609863 | 454 | <i>RPE65</i>    | 180069 | 654 | <i>AUH</i>      | 600529 |
| 55 | <i>NSD1</i>    | 606681 | 255 | <i>TMEM237</i>  | 614423 | 455 | <i>OFD1</i>     | 300170 | 655 | <i>MMACHC</i>   | 609831 |
| 56 | <i>PLA2G5</i>  | 601192 | 256 | <i>CEP41</i>    | 610523 | 456 | <i>EYS</i>      | 612424 | 656 | <i>ASPM</i>     | 605481 |
| 57 | <i>NOD2</i>    | 605956 | 257 | <i>TMEM138</i>  | 614459 | 457 | <i>CERKL</i>    | 608381 | 657 | <i>CDK5RAP2</i> | 608201 |
| 58 | <i>FOXL2</i>   | 605597 | 258 | <i>C5orf42</i>  | 614571 | 458 | <i>NRL</i>      | 162080 | 658 | <i>CEP135</i>   | 611423 |
| 59 | <i>DRD5</i>    | 126453 | 259 | <i>TCTN3</i>    | 613847 | 459 | <i>FAM161A</i>  | 613596 | 659 | <i>CEP152</i>   | 613529 |
| 60 | <i>OPN1MW</i>  | 300822 | 260 | <i>ZNF423</i>   | 604557 | 460 | <i>RPGR</i>     | 312610 | 660 | <i>ZNF335</i>   | 610827 |
| 61 | <i>PHF6</i>    | 300414 | 261 | <i>TMEM216</i>  | 613277 | 461 | <i>FSCN2</i>    | 613596 | 661 | <i>TACO1</i>    | 612958 |
| 62 | <i>NR2F1</i>   | 132890 | 262 | <i>TMEM231</i>  | 614949 | 462 | <i>TOPORS</i>   | 609507 | 662 | <i>DYSF</i>     | 603009 |
| 63 | <i>RLBP1</i>   | 180090 | 263 | <i>AHI1</i>     | 608894 | 463 | <i>SNRNP200</i> | 601664 | 663 | <i>MCOLN1</i>   | 605248 |
| 64 | <i>COL4A1</i>  | 120130 | 264 | <i>ARL13B</i>   | 608922 | 464 | <i>SEMA4A</i>   | 607292 | 664 | <i>ARSB</i>     | 611542 |
| 65 | <i>TFAP2A</i>  | 107580 | 265 | <i>CC2D2A</i>   | 612013 | 465 | <i>PRCD</i>     | 610598 | 665 | <i>GALNS</i>    | 612222 |

|     |         |        |     |          |        |     |          |        |     |           |        |
|-----|---------|--------|-----|----------|--------|-----|----------|--------|-----|-----------|--------|
| 66  | ZNF469  | 612078 | 266 | SLC16A12 | 611910 | 466 | NR2E3    | 604485 | 666 | GNS       | 607664 |
| 67  | PRDM5   | 614161 | 267 | LRAT     | 604863 | 467 | MERTK    | 604705 | 667 | GUSB      | 611499 |
| 68  | CYLD    | 605018 | 268 | KIF21A   | 608283 | 468 | RHO      | 180380 | 668 | IDS       | 300823 |
| 69  | GJA8    | 600897 | 269 | COL18A1  | 120328 | 469 | PDE6B    | 180072 | 669 | NAGLU     | 609701 |
| 70  | CRYBA1  | 123610 | 270 | GALC     | 606890 | 470 | PROM1    | 604365 | 670 | MSH2      | 609309 |
| 71  | PITX3   | 602669 | 271 | C1QTNF5  | 608752 | 471 | KLHL7    | 611119 | 671 | ITGA7     | 600536 |
| 72  | BFSP2   | 603212 | 272 | CLUAP1   | 616787 | 472 | PDE6A    | 180071 | 672 | LAMA2     | 156225 |
| 73  | GCNT2   | 600429 | 273 | NPHP3    | 608002 | 473 | RGR      | 600342 | 673 | SEPN1     | 606210 |
| 74  | GJA3    | 121015 | 274 | PEX1     | 602136 | 474 | CNGB1    | 600724 | 674 | PLEC      | 601282 |
| 75  | MIP     | 154050 | 275 | GUCY2D   | 600179 | 475 | IDH3B    | 604526 | 675 | CHRNA3    | 100730 |
| 76  | CRYAB   | 123590 | 276 | CEP290   | 610142 | 476 | SAG      | 181031 | 676 | DOK7      | 610285 |
| 77  | CRYBB1  | 600929 | 277 | RD3      | 180040 | 477 | GUCA1B   | 602275 | 677 | MSTN      | 601788 |
| 78  | FYCO1   | 607182 | 278 | RDH12    | 608830 | 478 | CNGA1    | 123825 | 678 | SCN4A     | 603967 |
| 79  | LIM2    | 154045 | 279 | KCNJ13   | 603208 | 479 | TTC8     | 608132 | 679 | DMPK      | 605377 |
| 80  | CRYGC   | 123680 | 280 | SPATA7   | 609868 | 480 | C2orf71  | 613425 | 680 | CNBP      | 116955 |
| 81  | CRYGS   | 123730 | 281 | AIPL1    | 604392 | 481 | ARL6     | 608845 | 681 | LMX1B     | 602575 |
| 82  | MAF     | 177075 | 282 | LCA5     | 611408 | 482 | IMPG2    | 607056 | 682 | NPC1      | 607107 |
| 83  | CRYBB3  | 123630 | 283 | RPGRIP1  | 605446 | 483 | PDE6G    | 180073 | 683 | TPM2      | 190990 |
| 84  | CRYBA4  | 123631 | 284 | CRX      | 602225 | 484 | ZNF513   | 613598 | 684 | TPM3      | 191030 |
| 85  | CRYBB2  | 123620 | 285 | NMNAT1   | 608700 | 485 | DHDDS    | 608172 | 685 | NEB       | 256030 |
| 86  | VIM     | 193060 | 286 | DTHD1    | 616979 | 486 | PRPF6    | 613979 | 686 | CFL2      | 601443 |
| 87  | CHMP4B  | 610897 | 287 | MT-ND1   | 516000 | 487 | CLRN1    | 606397 | 687 | SPINK5    | 605010 |
| 88  | BFSP1   | 603307 | 288 | COX10    | 602125 | 488 | MAK      | 154235 | 688 | PLA2G6    | 603604 |
| 89  | TDRD7   | 611258 | 289 | COX15    | 603646 | 489 | C8orf37  | 614477 | 689 | C19orf12  | 614297 |
| 90  | AGK     | 610345 | 290 | SURF1    | 185620 | 490 | CDHR1    | 609502 | 690 | COASY     | 609855 |
| 91  | CRYGB   | 123670 | 291 | OCRL     | 300535 | 491 | RBP3     | 180290 | 691 | NF2       | 607379 |
| 92  | CRYGD   | 123690 | 292 | CHST6    | 605294 | 492 | NEK2     | 604043 | 692 | MID1      | 300552 |
| 93  | NHS     | 300457 | 293 | ADIPOR1  | 607945 | 493 | SLC7A14  | 615720 | 693 | DDX59     | 615464 |
| 94  | WFS1    | 606201 | 294 | MT-TL1   | 590050 | 494 | PRPH2    | 179605 | 694 | TNFRSF11A | 603499 |
| 95  | CRYBA2  | 600836 | 295 | SOD2     | 147460 | 495 | IFT172   | 607386 | 695 | OSTM1     | 607649 |
| 96  | HSF4    | 602438 | 296 | BEST1    | 607854 | 496 | HGSNAT   | 610453 | 696 | SNX10     | 614780 |
| 97  | EPHA2   | 176946 | 297 | IMPG1    | 602870 | 497 | RP9      | 607331 | 697 | TCIRG1    | 604592 |
| 98  | CRYAA   | 123580 | 298 | PRDM13   | 616741 | 498 | GNPTG    | 607838 | 698 | TNFSF11   | 602642 |
| 99  | ABCA3   | 601615 | 299 | CDH3     | 114021 | 499 | ARL2BP   | 615407 | 699 | SLC26A4   | 605646 |
| 100 | IARS2   | 612801 | 300 | IFT140   | 614620 | 500 | RB1      | 614041 | 700 | PEX10     | 602859 |
| 101 | CCM2    | 607929 | 301 | FREM1    | 608944 | 501 | PLK4     | 605031 | 701 | PEX11B    | 603867 |
| 102 | ERCC2   | 126340 | 302 | MAP2K1   | 176872 | 502 | TINF2    | 604319 | 702 | PEX12     | 601758 |
| 103 | ERCC1   | 126380 | 303 | FBN1     | 134797 | 503 | KIAA0196 | 610657 | 703 | PEX13     | 601789 |
| 104 | CTC1    | 613129 | 304 | SIL1     | 608005 | 504 | RECQL4   | 268400 | 704 | PEX14     | 601791 |
| 105 | CHD7    | 608892 | 305 | MAPKAPK3 | 617111 | 505 | ESCO2    | 609353 | 705 | PEX16     | 603360 |
| 106 | SEMA3E  | 608166 | 306 | KRT3     | 148043 | 506 | UBIAD1   | 611632 | 706 | PEX26     | 608666 |
| 107 | LYST    | 606897 | 307 | CHRDL1   | 300350 | 507 | INVS     | 243305 | 707 | PEX5      | 600414 |
| 108 | PNPLA6  | 603197 | 308 | TUBGCP4  | 609610 | 508 | NPHP1    | 607100 | 708 | PEX6      | 601498 |
| 109 | KIF11   | 148760 | 309 | TUBGCP6  | 610053 | 509 | NPHP4    | 607215 | 709 | STK11     | 602216 |
| 110 | CHM     | 303100 | 310 | VSX2     | 142993 | 510 | IQCB1    | 609237 | 710 | PGK1      | 311800 |
| 111 | TMEM67  | 609884 | 311 | SHH      | 600725 | 511 | HESX1    | 601802 | 711 | KIT       | 164920 |
| 112 | ERCC8   | 609412 | 312 | ABCB6    | 605452 | 512 | ALDH3A2  | 609523 | 712 | CHMP1A    | 164010 |
| 113 | LONP1   | 605490 | 313 | STRA6    | 610745 | 513 | MTPAP    | 613669 | 713 | EXOSC3    | 606489 |
| 114 | PIGL    | 605947 | 314 | ALDH1A3  | 600463 | 514 | SYNE1    | 608441 | 714 | RARS2     | 611524 |
| 115 | OPN1LW  | 300824 | 315 | DHODH    | 126064 | 515 | ANO10    | 613726 | 715 | TSEN2     | 608753 |
| 116 | DRAM2   | 613360 | 316 | RYR1     | 180901 | 516 | EEF2     | 130610 | 716 | TSEN34    | 608754 |
| 117 | PCYT1A  | 123695 | 317 | GFER     | 600924 | 517 | ITPR1    | 147265 | 717 | TSEN54    | 608755 |
| 118 | UNC119  | 604011 | 318 | ACTA2    | 102620 | 518 | KCNC3    | 176264 | 718 | VRK1      | 602168 |
| 119 | C21orf2 | 603191 | 319 | TRIM37   | 605073 | 519 | KCND3    | 605411 | 719 | UROD      | 613521 |
| 120 | RAX2    | 610362 | 320 | B4GAT1   | 605517 | 520 | SPTBN2   | 604985 | 720 | PEX2      | 170993 |
| 121 | GUCA1A  | 600364 | 321 | DAG1     | 128239 | 521 | SYT14    | 610949 | 721 | PEX7      | 601757 |
| 122 | RAB28   | 612994 | 322 | LARGE1   | 603590 | 522 | TGM6     | 613900 | 722 | PHYH      | 602026 |
| 123 | TTLL5   | 612268 | 323 | AGRN     | 103320 | 523 | TTBK2    | 611695 | 723 | AGPS      | 603051 |
| 124 | POC1B   | 614784 | 324 | CHAT     | 118490 | 524 | WWOX     | 605131 | 724 | TWIST1    | 601622 |
| 125 | PDE6C   | 600827 | 325 | COLQ     | 603033 | 525 | ATXN10   | 611150 | 725 | ACTA1     | 102610 |
| 126 | PITPNM3 | 608921 | 326 | P3H2     | 610341 | 526 | ATXN7    | 607640 | 726 | FHL1      | 300163 |
| 127 | RIMS1   | 606629 | 327 | LRPAP1   | 104225 | 527 | ELOVL4   | 605512 | 727 | TRPV4     | 605427 |
| 128 | ADAM9   | 602713 | 328 | PRIMPOL  | 615421 | 528 | COL2A1   | 120140 | 728 | HSPG2     | 142461 |
| 129 | ACBD5   | 616618 | 329 | ZNF644   | 614159 | 529 | COL11A1  | 120280 | 729 | NEU1      | 608272 |
| 130 | MSMO1   | 607545 | 330 | ADAMTS18 | 607512 | 530 | COL11A2  | 120290 | 730 | DHCR7     | 602858 |
| 131 | CAV1    | 601047 | 331 | CAPN5    | 602537 | 531 | COL9A1   | 120210 | 731 | NFIX      | 164005 |
| 132 | SLC33A1 | 603690 | 332 | LAMB2    | 150325 | 532 | COL9A2   | 120260 | 732 | AP4M1     | 602296 |
| 133 | CTDP1   | 604927 | 333 | PPT1     | 600722 | 533 | TEAD1    | 189967 | 733 | AP5Z1     | 613653 |

|     |                 |        |     |                 |        |     |                 |        |     |                 |        |
|-----|-----------------|--------|-----|-----------------|--------|-----|-----------------|--------|-----|-----------------|--------|
| 134 | <i>FBN2</i>     | 612570 | 334 | <i>CTSD</i>     | 116840 | 534 | <i>NAA10</i>    | 300013 | 734 | <i>B4GALNT1</i> | 601873 |
| 135 | <i>POMT1</i>    | 607423 | 335 | <i>GRN</i>      | 138945 | 535 | <i>VAX1</i>     | 604294 | 735 | <i>CYP2U1</i>   | 610670 |
| 136 | <i>TMEM5</i>    | 605862 | 336 | <i>CTSF</i>     | 603539 | 536 | <i>RARB</i>     | 180220 | 736 | <i>CYP7B1</i>   | 603711 |
| 137 | <i>B3GALNT2</i> | 610194 | 337 | <i>TPP1</i>     | 607998 | 537 | <i>HMGB3</i>    | 300193 | 737 | <i>DDHD2</i>    | 615003 |
| 138 | <i>POMK</i>     | 615247 | 338 | <i>CLN3</i>     | 607042 | 538 | <i>MAB21L2</i>  | 604357 | 738 | <i>ERLIN2</i>   | 611605 |
| 139 | <i>GMPPB</i>    | 615320 | 339 | <i>DNAJC5</i>   | 611203 | 539 | <i>BCOR</i>     | 300485 | 739 | <i>FA2H</i>     | 611026 |
| 140 | <i>POMT2</i>    | 607439 | 340 | <i>CLN6</i>     | 608102 | 540 | <i>SOX2</i>     | 184429 | 740 | <i>GBA2</i>     | 609471 |
| 141 | <i>POMGNT1</i>  | 606822 | 341 | <i>CLN5</i>     | 608102 | 541 | <i>OTX2</i>     | 600037 | 741 | <i>HSPD1</i>    | 118190 |
| 142 | <i>FKTN</i>     | 607440 | 342 | <i>MFSD8</i>    | 611124 | 542 | <i>BMP4</i>     | 112262 | 742 | <i>KIF1A</i>    | 601255 |
| 143 | <i>FKRP</i>     | 606596 | 343 | <i>CLN8</i>     | 607837 | 543 | <i>HCCS</i>     | 300056 | 743 | <i>KIF5A</i>    | 602821 |
| 144 | <i>ISPD</i>     | 614631 | 344 | <i>MT-ATP6</i>  | 516060 | 544 | <i>TTR</i>      | 105210 | 744 | <i>MARS2</i>    | 609728 |
| 145 | <i>POMGNT2</i>  | 614828 | 345 | <i>ABHD5</i>    | 275630 | 545 | <i>TCOF1</i>    | 606847 | 745 | <i>NIPA1</i>    | 608145 |
| 146 | <i>GNAT1</i>    | 139330 | 346 | <i>NPC2</i>     | 601015 | 546 | <i>OPN1SW</i>   | 613522 | 746 | <i>REEP1</i>    | 609139 |
| 147 | <i>GRK1</i>     | 180381 | 347 | <i>SMPD1</i>    | 607608 | 547 | <i>TUBB3</i>    | 602661 | 747 | <i>RTN2</i>     | 603183 |
| 148 | <i>CACNA1F</i>  | 300110 | 348 | <i>PTPN11</i>   | 176876 | 548 | <i>ADGRV1</i>   | 602851 | 748 | <i>SPG11</i>    | 610844 |
| 149 | <i>NYX</i>      | 300278 | 349 | <i>KRAS</i>     | 190070 | 549 | <i>WHRN</i>     | 607928 | 749 | <i>SPG7</i>     | 602783 |
| 150 | <i>TRPM1</i>    | 603576 | 350 | <i>SOS1</i>     | 182530 | 550 | <i>CEP250</i>   | 609689 | 750 | <i>ZFYVE27</i>  | 610243 |
| 151 | <i>SLC24A1</i>  | 603617 | 351 | <i>RAF1</i>     | 164760 | 551 | <i>MYO7A</i>    | 276903 | 751 | <i>MAPT</i>     | 157140 |
| 152 | <i>GRM6</i>     | 604096 | 352 | <i>NRAS</i>     | 164790 | 552 | <i>USH1C</i>    | 605242 | 752 | <i>SALL1</i>    | 602218 |
| 153 | <i>CABP4</i>    | 608965 | 353 | <i>BRAF</i>     | 164757 | 553 | <i>CDH23</i>    | 605516 | 753 | <i>POLR1C</i>   | 610060 |
| 154 | <i>GPR179</i>   | 614515 | 354 | <i>NDP</i>      | 300658 | 554 | <i>PCDH15</i>   | 605514 | 754 | <i>BAP1</i>     | 603089 |
| 155 | <i>LRIT3</i>    | 615004 | 355 | <i>RP1L1</i>    | 608581 | 555 | <i>USH1G</i>    | 607696 | 755 | <i>IRF6</i>     | 607199 |
| 156 | <i>GNB3</i>     | 139130 | 356 | <i>IGBP1</i>    | 300139 | 556 | <i>USH2A</i>    | 608400 | 756 | <i>TBX1</i>     | 602054 |
| 157 | <i>DCN</i>      | 125255 | 357 | <i>HMX1</i>     | 142992 | 557 | <i>PDZD7</i>    | 612971 | 757 | <i>EPG5</i>     | 615068 |
| 158 | <i>PLG</i>      | 173350 | 358 | <i>OCA2</i>     | 611409 | 558 | <i>HARS</i>     | 142810 | 758 | <i>ERCC3</i>    | 133510 |
| 159 | <i>KERA</i>     | 603288 | 359 | <i>TYRP1</i>    | 115501 | 559 | <i>CIB2</i>     | 605564 | 759 | <i>XPA</i>      | 611153 |
| 160 | <i>TGFB1</i>    | 601692 | 360 | <i>SLC45A2</i>  | 606574 | 560 | <i>MT-TS2</i>   | 590085 | 760 | <i>XPC</i>      | 613208 |
| 161 | <i>TACSTD2</i>  | 137290 | 361 | <i>SLC24A5</i>  | 609802 | 561 | <i>VCAN</i>     | 118661 | 761 | <i>BLM</i>      | 210900 |
| 162 | <i>KRT12</i>    | 601687 | 362 | <i>C10orf11</i> | 614537 | 562 | <i>VHL</i>      | 608537 | 762 | <i>GRHPR</i>    | 604296 |
| 163 | <i>VSX1</i>     | 605020 | 363 | <i>GJA1</i>     | 121014 | 563 | <i>SMOC1</i>    | 608488 | 763 | <i>CEP135</i>   | 611423 |
| 164 | <i>SLC4A11</i>  | 610206 | 364 | <i>PABPN1</i>   | 602279 | 564 | <i>TYR</i>      | 606933 | 764 | <i>COASY</i>    | 609855 |
| 165 | <i>PIKFYVE</i>  | 609414 | 365 | <i>KCTD7</i>    | 611725 | 565 | <i>PAX3</i>     | 606597 | 765 | <i>STK11</i>    | 602216 |
| 166 | <i>PXDN</i>     | 605158 | 366 | <i>ATP1A3</i>   | 182350 | 566 | <i>MITF</i>     | 156845 | 766 | <i>VRK1</i>     | 602168 |
| 167 | <i>CYP4V2</i>   | 608614 | 367 | <i>RTN4IP1</i>  | 610502 | 567 | <i>SNAI2</i>    | 602150 | 767 | <i>CYP2U1</i>   | 610670 |
| 168 | <i>SLITRK6</i>  | 609681 | 368 | <i>UCHL1</i>    | 191342 | 568 | <i>EDNRB</i>    | 131244 | 768 | <i>NIPA1</i>    | 608145 |
| 169 | <i>TIMM8A</i>   | 300356 | 369 | <i>AFG3L2</i>   | 604581 | 569 | <i>EDN3</i>     | 131242 | 769 | <i>CAV3</i>     | 601253 |
| 170 | <i>EP300</i>    | 602700 | 370 | <i>C12orf65</i> | 613541 | 570 | <i>SOX10</i>    | 602229 | 770 | <i>LAMB3</i>    | 150310 |
| 171 | <i>FUCA1</i>    | 612280 | 371 | <i>PRPS1</i>    | 311850 | 571 | <i>RAB3GAP1</i> | 602536 | 771 | <i>LAMC2</i>    | 150292 |
| 172 | <i>ITGB3</i>    | 173470 | 372 | <i>SLC25A46</i> | 610826 | 572 | <i>RAB3GAP2</i> | 609275 | 772 | <i>ITGA2B</i>   | 607759 |
| 173 | <i>ROM1</i>     | 180721 | 373 | <i>OPA1</i>     | 605290 | 573 | <i>RAB18</i>    | 602207 | 773 | <i>ANO5</i>     | 608662 |
| 174 | <i>EFEMP1</i>   | 601548 | 374 | <i>OPA3</i>     | 606580 | 574 | <i>TBC1D20</i>  | 611663 | 774 | <i>GDF2</i>     | 605120 |
| 175 | <i>CHN1</i>     | 118423 | 375 | <i>TMEM126A</i> | 612988 | 575 | <i>ADAMTS10</i> | 608990 | 775 | <i>SHOX</i>     | 312865 |
| 176 | <i>SALL4</i>    | 607343 | 376 | <i>MFN2</i>     | 608507 | 576 | <i>ADAMTS17</i> | 607511 | 776 | <i>SGCG</i>     | 608896 |
| 177 | <i>ABCC2</i>    | 601107 | 377 | <i>SIX6</i>     | 606326 | 577 | <i>WRN</i>      | 604611 | 777 | <i>SGCA</i>     | 600119 |
| 178 | <i>ACD</i>      | 609377 | 378 | <i>NBAS</i>     | 608025 | 578 | <i>TLR2</i>     | 603028 | 778 | <i>TCAP</i>     | 604488 |
| 179 | <i>NHP2</i>     | 606470 | 379 | <i>PAX6</i>     | 607108 | 579 | <i>ATP7B</i>    | 606882 | 779 | <i>KCNQ1</i>    | 607542 |
| 180 | <i>NOP10</i>    | 606471 | 380 | <i>GP1BA</i>    | 606672 | 580 | <i>NIPBL</i>    | 608667 | 780 | <i>CUBN</i>     | 602997 |
| 181 | <i>TERT</i>     | 187270 | 381 | <i>DMD</i>      | 300377 | 581 | <i>HDAC8</i>    | 300269 | 781 | <i>CENPJ</i>    | 609279 |
| 182 | <i>WRAP53</i>   | 612661 | 382 | <i>CTNNA1</i>   | 116805 | 582 | <i>CISD2</i>    | 611507 | 782 | <i>MCPH1</i>    | 607117 |
| 183 | <i>EDARADD</i>  | 606603 | 383 | <i>B3GLCT</i>   | 610308 | 583 | <i>RS1</i>      | 300839 | 783 | <i>STIL</i>     | 181590 |
| 184 | <i>PKP1</i>     | 601975 | 384 | <i>PHOX2A</i>   | 602753 | 584 | <i>GPR143</i>   | 300808 | 784 | <i>HYAL1</i>    | 607071 |
| 185 | <i>COL3A1</i>   | 120180 | 385 | <i>MT-TH</i>    | 590040 | 585 | <i>DNAJC19</i>  | 608977 | 785 | <i>CAPN3</i>    | 114240 |
| 186 | <i>PLOD1</i>    | 153454 | 386 | <i>TUBA8</i>    | 605742 | 586 | <i>SF3B4</i>    | 605593 | 786 | <i>MYH7</i>     | 609928 |
| 187 | <i>TNXB</i>     | 600985 | 387 | <i>MYOC</i>     | 601652 | 587 | <i>PIK3R1</i>   | 171833 | 787 | <i>MYOT</i>     | 604103 |
| 188 | <i>LOXL1</i>    | 153456 | 388 | <i>OPTN</i>     | 602432 | 588 | <i>HGD</i>      | 607474 | 788 | <i>TNNT1</i>    | 191041 |
| 189 | <i>ZNF408</i>   | 616454 | 389 | <i>WDR36</i>    | 609669 | 589 | <i>KCNJ10</i>   | 602208 | 789 | <i>SEPSECS</i>  | 613009 |
| 190 | <i>MC1R</i>     | 155555 | 390 | <i>NTF4</i>     | 162662 | 590 | <i>MRE11A</i>   | 600814 | 790 | <i>ATP7A</i>    | 300011 |
| 191 | <i>IKBKAP</i>   | 603722 | 391 | <i>CYP1B1</i>   | 601771 | 591 | <i>ATM</i>      | 607585 | 791 | <i>HPD</i>      | 609695 |
| 192 | <i>RCBTB1</i>   | 607867 | 392 | <i>LTBP2</i>    | 602091 | 592 | <i>ATP2C1</i>   | 604384 | 792 | <i>TAT</i>      | 613018 |
| 193 | <i>FZD4</i>     | 604579 | 393 | <i>POLG</i>     | 174763 | 593 | <i>COL6A3</i>   | 120250 |     |                 |        |
| 194 | <i>LRP5</i>     | 603506 | 394 | <i>RNASEH1</i>  | 604123 | 594 | <i>COL6A2</i>   | 120240 |     |                 |        |
| 195 | <i>TSPAN12</i>  | 613138 | 395 | <i>SLC25A4</i>  | 103220 | 595 | <i>BLM</i>      | 210900 |     |                 |        |
| 196 | <i>FGFR1</i>    | 136350 | 396 | <i>C10orf2</i>  | 606075 | 596 | <i>MTM1</i>     | 300415 |     |                 |        |
| 197 | <i>FGFR2</i>    | 176943 | 397 | <i>POLG2</i>    | 604983 | 597 | <i>CYP27A1</i>  | 606530 |     |                 |        |
| 198 | <i>FGFR3</i>    | 134934 | 398 | <i>RRM2B</i>    | 604712 | 598 | <i>TFAP2B</i>   | 601601 |     |                 |        |
| 199 | <i>LCAT</i>     | 606967 | 399 | <i>DNA2</i>     | 601810 | 599 | <i>DNM2</i>     | 602378 |     |                 |        |
| 200 | <i>FOXE3</i>    | 601094 | 400 | <i>RGS9</i>     | 604067 | 600 | <i>PDK3</i>     | 300906 |     |                 |        |
