# Supplementary material for: Mutation spectrum in a cohort with familial exudative vitreoretinopathy
Source: PubMed Central journal article supplement (PMC9482396; doi:10.1002/mgg3.2021), 2022-07-25

**Supplementary Figure 1.** Pedigrees of 20 variant-carried families. Filled symbol means affected patients with FEVR, the unfilled symbol indicates unaffected individuals, and the dotted symbols denote carriers. “M” indicates mutant alleles, “Y” indicates Y chromosome normal alleles, “+” indicates normal allele, and “\*” indicates de novo

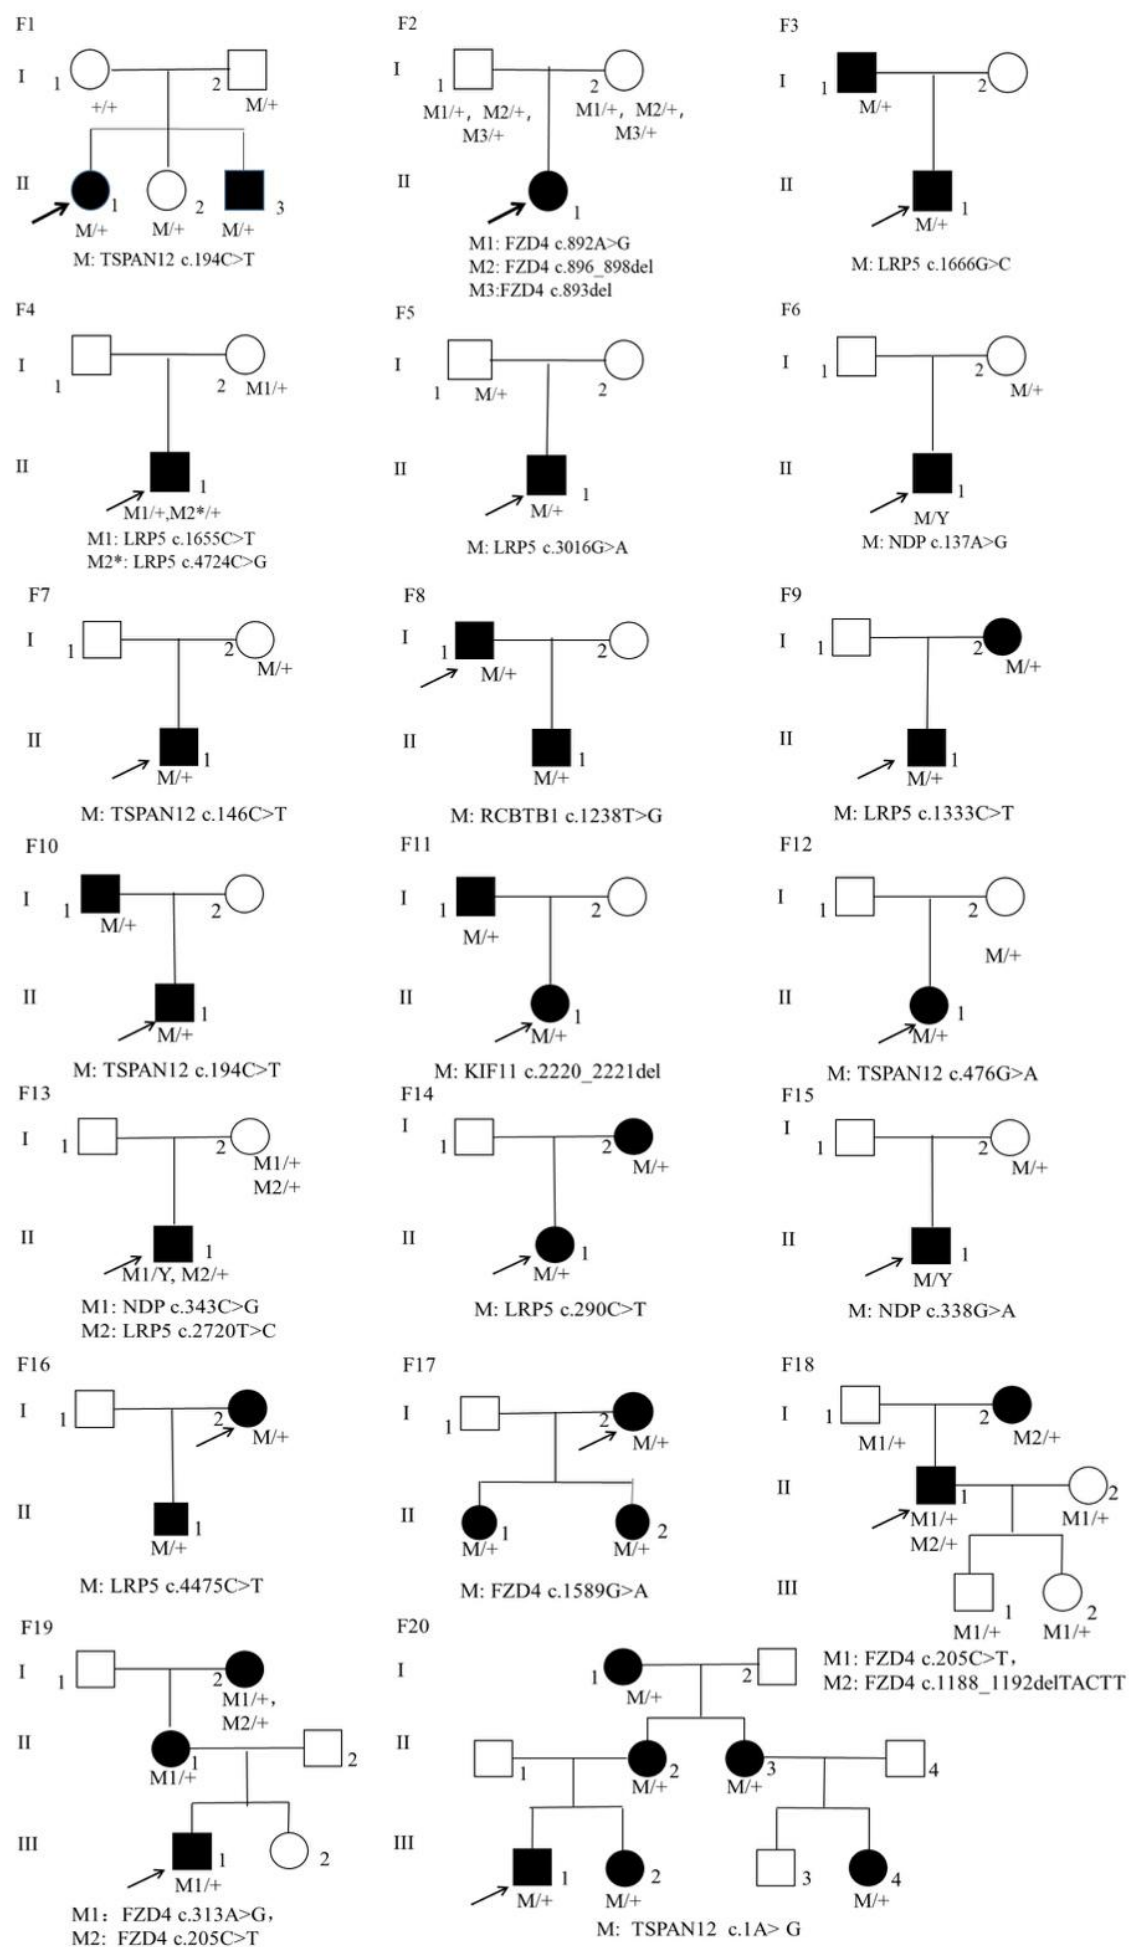

Supplement: MGG3-10-e2021-s002.pdf [file MGG3-10-e2021-s002.pdf]
